## RESEARCH ARTICLE

# Effects of behavioral observability and social proof on the coupled epidemic-awareness dynamics in multiplex networks

Huayan Pei<sup>1\*</sup>, Huanmin Wang<sup>2</sup>, Guanghui Yan<sup>1</sup>

<sup>1</sup> School of Electronic and Information Engineering, Lanzhou Jiaotong University, Lanzhou, Gansu, China, <sup>2</sup> School of Mechanical Engineering, Lanzhou Jiaotong University, Lanzhou, Gansu, China

\* [pei123com@126.com](mailto:pei123com@126.com)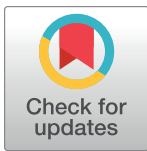**OPEN ACCESS**

**Citation:** Pei H, Wang H, Yan G (2024) Effects of behavioral observability and social proof on the coupled epidemic-awareness dynamics in multiplex networks. PLoS ONE 19(7): e0307553. <https://doi.org/10.1371/journal.pone.0307553>

**Editor:** Minyu Feng, Southwest University, CHINA

**Received:** March 21, 2024

**Accepted:** June 22, 2024

**Published:** July 23, 2024

**Copyright:** © 2024 Pei et al. This is an open access article distributed under the terms of the [Creative Commons Attribution License](https://creativecommons.org/licenses/by/4.0/), which permits unrestricted use, distribution, and reproduction in any medium, provided the original author and source are credited.

**Data Availability Statement:** All the data used are generated by the algorithms described in the article, or their sources are shown in the references.

**Funding:** This work was supported by (i) Project supported by the National Natural Science Foundation of China (Grant No. 62062049, 62366028); (ii) Gansu Provincial Science and Technology Plan Project, China (Grant No. 21ZD8RA008); (iii) Project supported by the Natural Science Foundation of Gansu Province, China (Grant No. 23JRRA1688); (iv) The Support Project for Youth Doctor in Colleges and

## Abstract

Despite much progress in exploring the coupled epidemic-awareness dynamics in multiplex networks, little attention has been paid to the joint impacts of behavioral observability and social proof on epidemic spreading. Since both the protective actions taken by direct neighbors and the observability of these actions have essential influence on individuals' decisions. Thus, we propose a UAPU-SIR model by integrating the effects of these two factors into the decision-making process of taking preventive measures. Specifically, a new state called taken protective actions is introduced into the original unaware-aware-unaware (UAU) model to characterize the action-taken state of individuals after getting epidemic-related information. Using the Microscopic Markov Chain Approach (MMCA), the methods and model are described, and the epidemic threshold is analytically derived. We find that both observability of protecting behaviors and social proof can reduce the epidemic prevalence and raise the epidemic threshold. Moreover, only if observability of protection actions reaches a certain threshold can accelerating information diffusion is able to inhibit disease spreading and result in higher epidemic threshold. We also discover that, reducing the forgetting rate of information is able to decrease epidemic size.

## Introduction

The outburst and transmission of infectious diseases (e.g., smallpox [1], measles [2], Ebola virus [3, 4], and COVID-19 [5–7], etc.) may significantly affect human life and health, and cause economic burden for individuals or countries. When an epidemic breaks out in the population, people's opinions, discussions and other epidemic-related information spread quickly on various virtual platforms. That is, the outbreak and dissemination of epidemics is commonly followed by information diffusion. Individuals may take certain protective actions such as wearing medical masks, reducing party activities and staying out of crowded places after gaining the infective disease-related information, which in turn may drastically influence epidemic spreading [8–12]. In modelling the impact of human actions on epidemic propagation, the influence of behavioral change is a decisive determinant except the sources of information

Universities of Gansu Province (Grant No. 2023QB-038); (v) The Science and Technology Plan Project of Lanzhou City (Grant No. 2021-1-150).

**Competing interests:** The authors have declared that no competing interests exist.

[13, 14]. Thus, the factors cause behavioral alteration may also affect epidemic dissemination. Consequently, it is extremely crucial to explore the complex interplay patterns between epidemic spreading and behavioral change determinants, which has salient significance for the prevention or control of infectious diseases.

Over the past few decades, there has been growing interest in exploring the coupled epidemic-awareness dynamics within the multiplex network framework [15–27]. Typically, in 2009, Funk et al. investigated the impact of awareness diffusion on epidemic spreading on single-layered network [9]. They revealed that information dissemination is able to decrease the incidence of epidemics, and even inhibit the outburst of epidemics under certain conditions. As pioneers, Granell et al. [15] firstly proposed a UAU-SIS model to explore the dynamical interplay between awareness diffusion and epidemic spreading on multiplex networks, and found that information transmission can help to control the outbreak threshold of epidemic. Later, Granell et al. [16] further studied the mutual effect of information and infective diseases dissemination on multiplex networks by taking the effect of mass media into consideration. Wang et al. [17] constructed an asymmetrically interacting, double-layer network model to analyze the interplay between information diffusion and epidemic spreading. Their results suggested that the outburst of epidemic on a physical-contact network can induce an outbreak of awareness propagation on the communication network, which in turn can efficiently increase the epidemic threshold. Guo et al. [18] uncovered the effect of awareness diffusion on the outburst of epidemic in multiplex networks, and showed that the community information ratio has two-stage impacts on epidemic threshold and results in distinct final epidemic sizes. Besides, Wang et al. [19] explored the propagation dynamics between information diffusion and disease contagion, and uncovered that there exist asymmetrical interactions between the two processes.

In particular, Zheng et al. [20] proposed a UAU-SIR model to investigate the interplay between disease propagation and awareness dissemination in multiplex networks. Moreover, Zhan et al. [21] investigated the coupling dynamics of epidemic diffusion and awareness dissemination, and revealed that epidemic spreading favors information propagation, which in turn suppresses the transmission of infectious disease. It is worth noting that Xia et al. [22] presented a UAU-SIR model to uncover the impacts of mass media on epidemic transmission. Wang et al. [23] and Kabir et al. [24] proposed a UAU-SIR model to uncover the impact of awareness diffusion on epidemic transmission, and the findings demonstrated that the epidemic threshold is closely associated with the propagation of information and the topology of physical-contact network. Kabir and Tanimoto [25] established an SIR-UAU model to discover the role of information dissemination on disease spreading under diverse network structures. Besides, Wang et al. [26, 27] further investigated the impact of two opposing information on epidemic spreading in the absence and presence of mass media. They concluded that these two kinds of information have contrary impacts on epidemic prevention and control. Additionally, Feng et al. [28] uncovered how individuals with different properties in the information diffusion layer influences the transmission of epidemics. These investigations suggest that epidemic spreading is highly related to the relevant information diffusion.

In the real world, generally, the type of information on which people base their decisions is locally available information, but not the globally available one. Since we commonly care more about the decisions made by our friends or acquaintances rather than others in the population. That is to say, in most cases, the choices of our immediate neighbors have decisive impacts on our options [29], and may ultimately result in a behavioral change. This phenomenon is called social proof by psychologists, which is defined as the situation in which an individual needs various inspire from neighbors before adopting a behavior or an opinion [30–32]. Most importantly, social proof requires the behaviors can be observable either directly or via gossip, which is called behavioral observability. In other words, individuals prefer to imitate the

actions of their direct neighbors, which is due mainly to the choices of others may provide effective reference for us [29]. As a result, when an epidemic breaks out in the population, whether to or take what protective measures is strongly associated with the observable actions have been taken by nearest neighbors [33].

Motivated by these research, we propose a UAPU-SIR model by incorporating the impacts of behavioral observability and social proof into the decision-making process of taking preventing actions. A new state called taken protective actions (abbreviated as P) is introduced into the classical UAU model to characterize the action-taken state of individuals after gaining disease-related information. The influence of social proof in online shopping has been previously investigated [34, 35], as well as the effect of behavioral observability on prosocial behavior [36, 37]. However, to the best of our knowledge, the impacts of behavioral observability and social proof on epidemic spreading has not been previously reported. In our work, the probability of aware-state individuals to take defensive measures and change into P-state is jointly decided by these two factors.

In the proposed model, a two-layer multiplex network is used to characterize the coupled interaction process between information and epidemic. The upper layer denotes the diffusion of information, and the lower one represents the transmission of epidemic. The Microscopic Markov Chain Approach (MMCA) is utilized to theoretically analyze our model. Here, our focus is to explore the effects of behavioral observability, social proof, as well as information diffusion on epidemic spreading scale, speed and the outburst threshold. Simulation results show that under the proposed model, the observability of immediate neighbors' protecting actions, the decisions of nearby neighbors (the social proof), as well as the diffusion of information greatly inhibit epidemic contagion, and lead to higher epidemic threshold. It is noteworthy that the longer the disease-related information exists in the population, the more obvious the inhibition effect of our model on epidemic spreading.

This paper is arranged as below. Materials and methods section describes the co-evolutionary spreading model in detail, and analytically derives the epidemic threshold. Simulation results and discussions section presents and discusses the simulation results. Conclusion section gives a summary of this work.

## Materials and methods

### Model description

In this work, a two-layer coupled network is used to portray the co-evolution propagation between epidemic and information, as shown in Fig 1. The upper layer is the information diffusion network, which is a virtual network such as Weibo or Facebook. The lower one is the epidemic spreading network which is a physical contact network. In the information transmission layer, the proposed UAPU (unaware-aware-taken protective actions-unaware) model is used. To be specific, a new state called taken protective actions (abbreviated as P) is incorporated into the traditional UAU model to describe the status that an individual has taken prevention measures. Individuals in states U do not have disease-related information [15], hence, they will not take epidemic prevention actions. Each individual in states A has epidemic-related information, but does not take any preventive actions. The disease-related information can be obtained with the probability  $\lambda$  through two sources, one is the individual infected the disease in the lower layer, the other is he has communication with A-state or P-state neighbors in the upper layer. Notably, individuals in states A have a certain possibility  $\psi$  ( $\psi \in [0, 1]$ ) to take prevention measures and change into P-state. For P-state individuals, the forgetting rate of information is  $\delta$ . In the lower layer, the classical SIR (susceptible-infected-susceptible) model is applied to describe the process of epidemic spreading. The state transition schematic of the proposed model is illustrated in Fig 2.

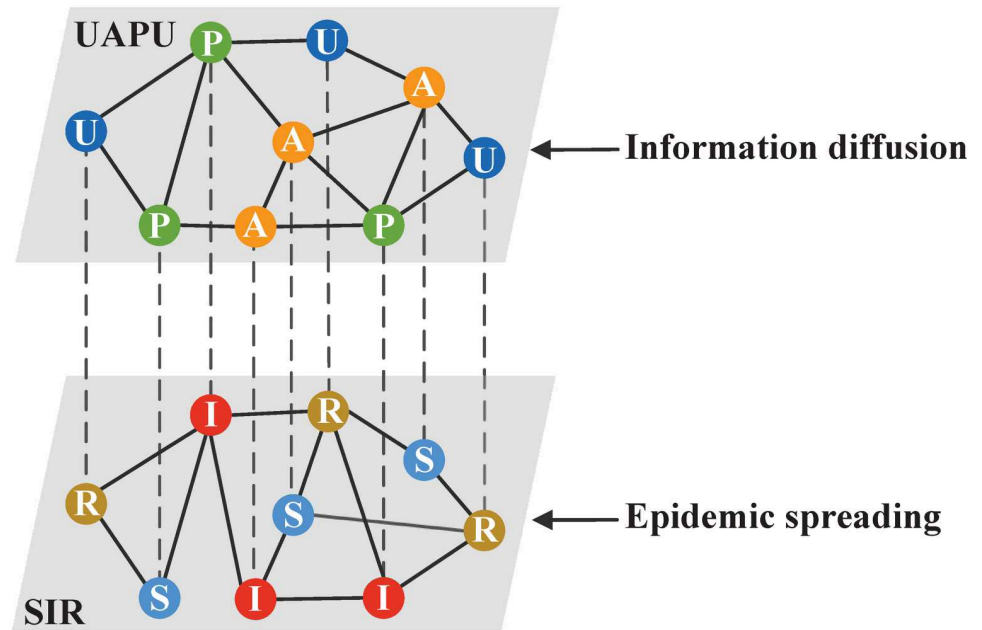

**Fig 1. Schematic diagram of the two-layer coupled network employed in the UAPU-SIR model.** The procedure of information diffusion is illustrated in the upper layer. The process of epidemic propagation is exhibited in the lower layer. The green nodes in the upper layer denote the individuals who take self-protective actions.

<https://doi.org/10.1371/journal.pone.0307553.g001>

In our model, apart from the initial five states in the UAU-SIR model, three new different statuses are introduced: taken protective action and susceptible (PS); taken protective action and infected (PI); taken protective action and recovered (PR). Noteworthy, an individual will instantly change into AI state once he has infected the epidemic. Therefore, the state UI is spurious.

In the real world, how people respond to the sudden outburst of epidemic not only depend on the locally available information, but also the observability of protective behaviors that have been taken by their immediate neighbors. In other words, the observable actions of those around us plays an essential role in our behavioral change. Inspired by this fact, we integrate behavioral observability and social proof into the coupled awareness-disease model, and present a UAPU-SIR model. More explicitly, the probability of an A-state individual changes into P-state is jointly decided by two factors. One is the observability of nearby neighbors' protective actions, which is represented by the behavioral observability factor  $\eta$ . The other is the decisions of immediate neighbors, which is denoted by the fraction of P-state neighbors. That is, the more neighbors taking protecting measures, the higher the possibility for an individual to

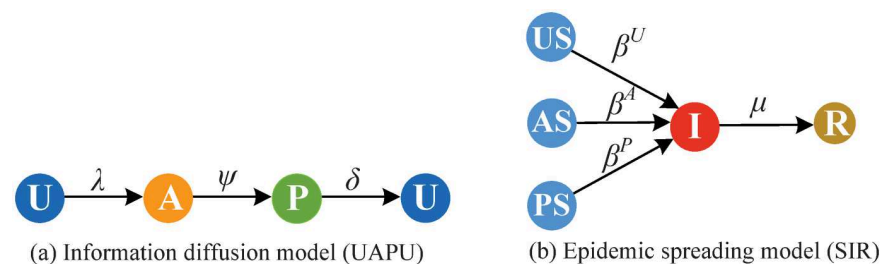

**Fig 2. The state transition schematic of information diffusion [panel(a)] and epidemic transmission [panel(b)].**

<https://doi.org/10.1371/journal.pone.0307553.g002>

transform from A-state to P-state, which well reflects the influence of social proof on individuals' decisions. Thus, the probability  $\psi$  that an individual takes protective actions and changes into P-state can be calculated as

$$\psi = \log_2 \left[ 1 + p * \eta + (1 - p) * \frac{\sum_j a_{ji} P_j^P(t)}{k_i} \right]. \tag{1}$$

where parameter  $p \in [0, 1]$  denotes the influence intensity' proportion of behavioral observability and social proof on  $\psi$ . Parameter  $\eta \in [0, 1]$  represents the influence strength of behavioral observability on  $\psi$ . In our model, larger  $\eta$  represents greater observability, which implies that with a higher possibility, one's protective behavior can be observed or learned by others in the same population. Parameter  $P_j^P(t)$  denotes the possibility that neighbor  $j$  of individual  $i$  is in P-state, and  $k_i$  denotes the total number of node  $i$ 's direct neighbors. Parameter  $a_{ji}$  denotes the elements of the adjacency matrix of the upper layer. In the proposed model, A-state individuals do not take any prevention actions if  $\psi = 0$ , indicating that information diffusion do not affect epidemic transmission. Conversely, P-state individuals are completely immune to epidemic spreading when  $\psi = 1$ .

The epidemic infection rate of individuals in U-state, A-state and P-state are represented as  $\beta^U, \beta^A$  and  $\beta^P$  respectively, where  $\beta^U = \beta, \beta^A = \gamma\beta$ , and  $\beta^P = \log_2(2 - \psi)\beta$ . In other words, the infectivity of individuals in AS state will be decreased by a factor  $\gamma$  ( $\gamma \in [0, 1]$ ), which is set to be 1 in our model. While, for individuals in PS state, the contagion rate will be reduced by a factor  $\log_2(2 - \psi)$  ( $\log_2(2 - \psi) \in [0, 1]$ ).

### Theoretical analysis

In this section, the MMCA is utilized to analyze the dynamical interaction between information diffusion and epidemic propagation. We define  $A = (a_{ij})$  and  $B = (b_{ij})$  as the adjacency matrix of the upper and lower layers. At time step  $t$ , the possibilities of individual  $i$  being in each state is denoted as  $p_i^{US}(t), p_i^{UR}(t), p_i^{AS}(t), p_i^{AI}(t), p_i^{AR}(t), p_i^{PS}(t), p_i^{PI}(t)$ , and  $p_i^{PR}(t)$ , respectively. Noteworthy, the dynamical correlations are assumed to be absent [38]. In the upper layer, the probability that an individual  $i$  in status US(UR) is not aware of epidemic-related information is  $r_i(t)$ . For the epidemic dissemination, the probability that an individual  $i$  in states U, A and P will not be infected at time step  $t$  is defined as  $q_i^U(t), q_i^A(t)$  and  $q_i^P(t)$ , respectively. As a consequence,  $r_i(t), q_i^U(t), q_i^A(t)$  and  $q_i^P(t)$  can be calculated as

$$r_i(t) = \prod_j [1 - a_{ji} p_j^{AP}(t) \lambda], \tag{2a}$$

$$q_i^U(t) = \prod_j \{1 - b_{ji} p_j^I(t) \beta^U\}, \tag{2b}$$

$$q_i^A(t) = \prod_j \{1 - b_{ji} p_j^I(t) \beta^A\}, \tag{2c}$$

$$q_i^P(t) = \prod_j \{1 - b_{ji} p_j^I(t) \beta^P\}, \tag{2d}$$

where  $p_j^{AP}(t) = p_j^{AS}(t) + p_j^{AI}(t) + p_j^{AR}(t) + p_j^{PS}(t) + p_j^{PI}(t) + p_j^{PR}(t)$ , and  $p_j^I(t) = p_j^{AI}(t) + p_j^{PI}(t)$ .

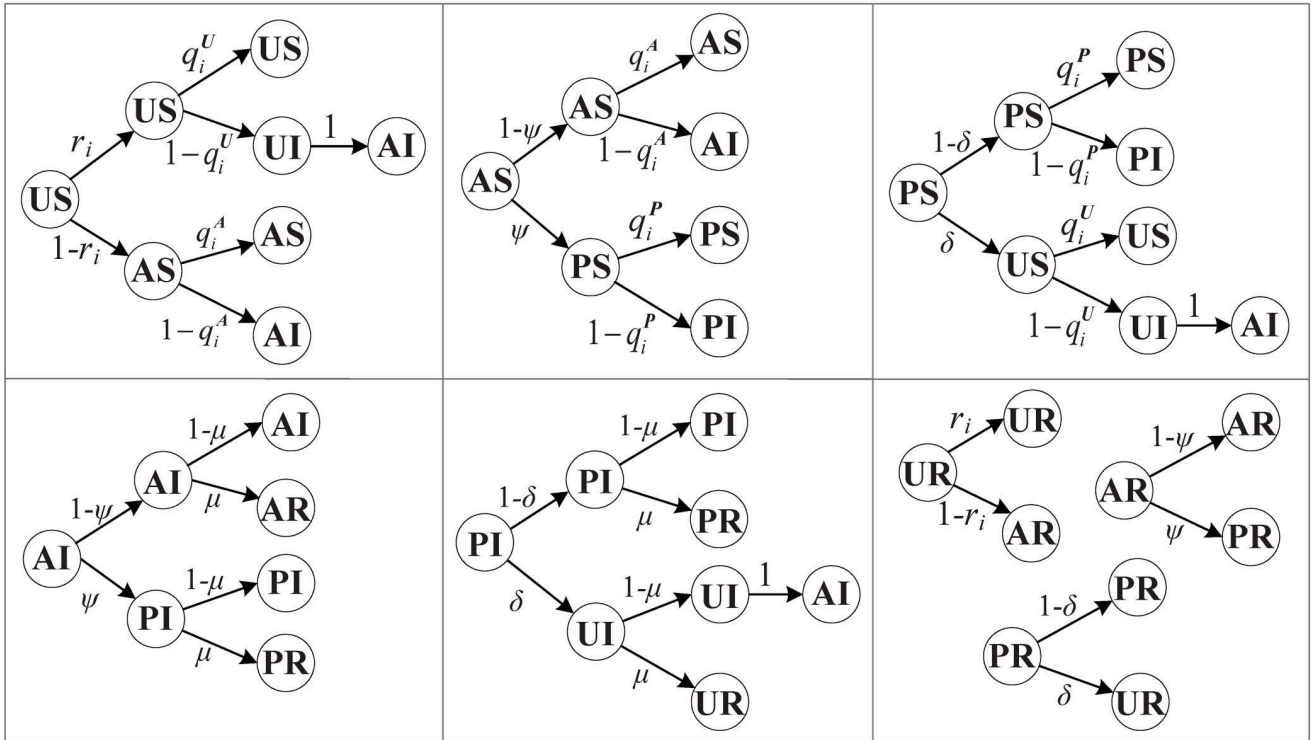

Fig 3. Transition probability trees of US, AS, PS, AI, PI, UR, AR, PR in the UAPU-SIR model.

<https://doi.org/10.1371/journal.pone.0307553.g003>

We establish the Markov state transition trees (as shown in Fig 3) to describe the possible transformations of each status, combining with Eqs (2a)–(2d), the MMCA equations for every node  $i$  at time step  $t$  can be attained as below

$$p_i^{US}(t + 1) = p_i^{US}(t)r_i(t)q_i^U(t) + p_i^{PS}(t)\delta q_i^U(t), \tag{3a}$$

$$p_i^{AS}(t + 1) = p_i^{US}(t)[1 - r_i(t)]q_i^A(t) + p_i^{AS}(t)(1 - \psi)q_i^A(t), \tag{3b}$$

$$p_i^{PS}(t + 1) = p_i^{AS}(t)\psi q_i^P(t) + p_i^{PS}(t)(1 - \delta)q_i^P(t), \tag{3c}$$

$$\begin{aligned} p_i^{AI}(t + 1) &= p_i^{US}(t)r_i(t)[1 - q_i^U(t)] + p_i^{US}(t)[1 - r_i(t)][1 - q_i^A(t)] \\ &+ p_i^{AS}(t)(1 - \psi)[1 - q_i^A(t)] + p_i^{PS}(t)\delta[1 - q_i^U(t)] \\ &+ p_i^{AI}(t)(1 - \psi)(1 - \mu) + p_i^{PI}(t)\delta(1 - \mu), \end{aligned} \tag{3d}$$

$$\begin{aligned} p_i^{PI}(t + 1) &= p_i^{AS}(t)\psi[1 - q_i^P(t)] + p_i^{PS}(t)(1 - \delta)[1 - q_i^P(t)] \\ &+ p_i^{AI}(t)\psi(1 - \mu) + p_i^{PI}(t)(1 - \delta)(1 - \mu), \end{aligned} \tag{3e}$$

$$p_i^{UR}(t + 1) = p_i^{UR}(t)r_i(t) + p_i^{PR}(t)\delta + p_i^{PI}(t)\delta\mu, \tag{3f}$$

$$p_i^{AR}(t + 1) = p_i^{AI}(t)(1 - \psi)\mu + p_i^{UR}(t)[1 - r_i(t)] + p_i^{AR}(t)(1 - \psi), \tag{3g}$$

$$p_i^{PR}(t + 1) = p_i^{AI}(t)\psi\mu + p_i^{AR}(t)\psi + p_i^{PR}(1 - \delta) + p_i^{PI}(t)(1 - \delta)\mu, \tag{3h}$$

where  $p_i^{US}(t) + p_i^{AS}(t) + p_i^{PS}(t) + p_i^{AI}(t) + p_i^{PI}(t) + p_i^{UR}(t) + p_i^{AR}(t) + p_i^{PR}(t) = 1$ .

When epidemic spreading reaches the stationary state,  $p_i^{US}(t + 1) = p_i^{US}(t) = p_i^{US}$  is satisfied for each node  $i$  and correspondingly for the other seven states. Near the critical point of the epidemic threshold, the infection probability of every node approaches 0. Hence, it can be set that  $p_i^I = p_i^{AI} + p_i^{PI} = \epsilon_i \ll 1$ . Consequently, Eqs (2b)–(2d) can be approximately changed into

$$q_i^U \approx 1 - \beta^U \sum_j b_{ji}\epsilon_j = 1 - \zeta_i, \tag{4a}$$

$$q_i^A \approx 1 - \gamma\beta^U \sum_j b_{ji}\epsilon_j = 1 - \gamma\zeta_i, \tag{4b}$$

$$q_i^P \approx 1 - \log_2(2 - \psi)\beta^U \sum_j b_{ji}\epsilon_j = 1 - \log_2(2 - \psi)\zeta_i, \tag{4c}$$

where

$$\zeta_i = \beta^U \sum_j b_{ji}\epsilon_j. \tag{5}$$

Inserting Eqs (4a)–(4c) into Eqs (3a)–(3e), we obtain

$$p_i^{US}(t + 1) = p_i^{US}(t)r_i(t)(1 - \zeta_i) + p_i^{PS}(t)\delta(1 - \zeta_i), \tag{6a}$$

$$p_i^{AS}(t + 1) = p_i^{US}(t)[1 - r_i(t)](1 - \gamma\zeta_i) + p_i^{AS}(t)(1 - \psi)(1 - \gamma\zeta_i), \tag{6b}$$

$$\begin{aligned} p_i^{PS}(t + 1) &= p_i^{AS}(t)\psi[1 - \log_2(2 - \psi)\zeta_i] \\ &+ p_i^{PS}(t)(1 - \delta)[1 - \log_2(2 - \psi)\zeta_i], \end{aligned} \tag{6c}$$

$$\begin{aligned} p_i^{AI}(t + 1) &= p_i^{US}(t)r_i(t)\zeta_i + p_i^{US}(t)[1 - r_i(t)]\gamma\zeta_i \\ &+ p_i^{AS}(t)(1 - \psi)\gamma\zeta_i + p_i^{PS}(t)\delta\zeta_i \\ &+ p_i^{AI}(t)(1 - \psi)(1 - \mu) + p_i^{PI}(t)\delta(1 - \mu), \end{aligned} \tag{6d}$$

$$\begin{aligned} p_i^{PI}(t + 1) &= p_i^{AS}(t)\psi\log_2(2 - \psi)\zeta_i + p_i^{PS}(t)(1 - \delta)\log_2(2 - \psi)\zeta_i \\ &+ p_i^{AI}(t)\psi(1 - \mu) + p_i^{PI}(t)(1 - \delta)(1 - \mu). \end{aligned} \tag{6e}$$

Meanwhile, when the system is at equilibrium, by adding Eqs (6d) and (6e), we can get

$$\begin{aligned} p_i^{AI} + p_i^{PI} &= (1 - \mu)(p_i^{AI} + p_i^{PI}) + \zeta_i(p_i^{US}r_i + p_i^{PS}\delta) \\ &+ \gamma\zeta_i[p_i^{US}(1 - r_i) + p_i^{AS}(1 - \psi)] \\ &+ \log_2(2 - \psi)\zeta_i[p_i^{AS}\psi + p_i^{PS}(1 - \delta)]. \end{aligned} \tag{7}$$

When  $\beta \rightarrow \beta_c$ , we can get  $p_i^{AI} \rightarrow 0, p_i^{PI} \rightarrow 0, p_i^{UR} \rightarrow 0, p_i^{AR} \rightarrow 0$ , and  $p_i^{PR} \rightarrow 0$ . Thus, it can be acquired that  $p_i^U = p_i^{US} + p_i^{UR} \approx p_i^{US}, p_i^A = p_i^{AS} + p_i^{AI} + p_i^{AR} \approx p_i^{AS}$ , and

$p_i^p = p_i^{ps} + p_i^{pi} + p_i^{pr} \approx p_i^{ps}$ . Therefore, Eq (7) can be rewritten as

$$\begin{aligned} \epsilon_i &= (1 - \mu)\epsilon_i + \xi_i(p_i^U r_i + p_i^p \delta) \\ &+ \gamma \xi_i [p_i^U (1 - r_i) + p_i^A (1 - \psi)] \\ &+ \log_2(2 - \psi) \xi_i [p_i^A \psi + p_i^p (1 - \delta)]. \end{aligned} \tag{8}$$

Further, removing  $\mathcal{O}(\epsilon_i)$  terms of Eqs (3a)–(3c), it can be obtained that

$$p_i^U = p_i^U r_i + p_i^p \delta, \tag{9a}$$

$$p_i^A = p_i^U (1 - r_i) + p_i^A (1 - \psi), \tag{9b}$$

$$p_i^p = p_i^A \psi + p_i^p (1 - \delta). \tag{9c}$$

Incorporating Eqs (9a)–(9c) into Eq (8), we can get

$$\epsilon_i = (1 - \mu)\epsilon_i + \xi_i p_i^U + \gamma \xi_i p_i^A + \log_2(2 - \psi) \xi_i p_i^p. \tag{10}$$

Additionally, taking Eq (5) into consideration, Eq (10) can be further rewritten as

$$\sum_j \left\{ [p_i^U + \gamma p_i^A + \log_2(2 - \psi) p_i^p] b_{ji} - \frac{\mu}{\beta^U} \theta_{ji} \right\} \epsilon_j = 0, \tag{11}$$

where  $\theta_{ij}$  represents the elements of identity matrix. Notably, the solution of Eq (11) reduces to resolve the eigenvalues of matrix  $H$  whose elements are  $h_{ji} = [p_i^U + \gamma p_i^A + \log_2(2 - \psi) p_i^p] b_{ji}$ .

We define the maximum eigenvalue of matrix  $H$  as  $\Lambda_{max}(H)$ , then the epidemic threshold is

$$\beta_c^U = \frac{\mu}{\Lambda_{max}(H)}. \tag{12}$$

According to Eqs (11) and (12), in our model, the outbreak of epidemic is tightly related to the diffusion of disease-related information, behavioral observability, social proof, and network structure of the epidemic transmission layer.

### Simulation results and discussions

In this work, two Barabasi-Albert (BA) networks are constructed on the upper and lower layers, the reconnected number  $m$  of the corresponding networks are 4 and 3, respectively. The size of each network is  $N = 3 \times 10^3$ . Here, MMCA and Monte Carlo (MC) are applied to carry out the simulations. For the MMCA,  $\rho^R, \rho^A, \rho^I, \rho^P$  are respectively calculated as

$\rho^R = \frac{1}{N} \sum_{i=1}^N (p_i^{UR} + p_i^{AR} + p_i^{PR}), \rho^A = \frac{1}{N} \sum_{i=1}^N (p_i^{AS} + p_i^{AI} + p_i^{AR}), \rho^I = \frac{1}{N} \sum_{i=1}^N (p_i^{AI} + p_i^{PI}),$   
 $\rho^P = \frac{1}{N} \sum_{i=1}^N (p_i^{PS} + p_i^{PI} + p_i^{PR})$ . Nevertheless, in MC simulation,  $\rho^R$  is computed as  $\rho^R = \frac{N_R}{N}$ , where  $N^R$  represents the total number of R-state individuals in the population. Let  $\rho^{AI}$  and  $\rho^{US}$  represent the percentage of nodes in status AI and US, respectively. Originally, it is set  $\rho^{AI} = 0.01$  and  $\rho^{US} = 0.99$ . Additionally, each data spot is acquired by averaging over 50 independent runs. In Fig 5, the results are obtained by MMCA and MC, and in Figs 4, 6 to 10, all the results are gained by MMCA.

Fig 4 explores the influence of behavioral observability and social proof on disease size and spreading speed from a microscopic point of view. It can be found that the values of  $\rho^P$  shows an obvious rise when  $\eta$  is increased from 0 to 0.3, and higher  $\rho^P$  can be observed with the further increase of  $\eta$ . This result suggests that when A-state individuals can observe the protective actions taken by direct neighbors, they are more inclined to take the same preventive

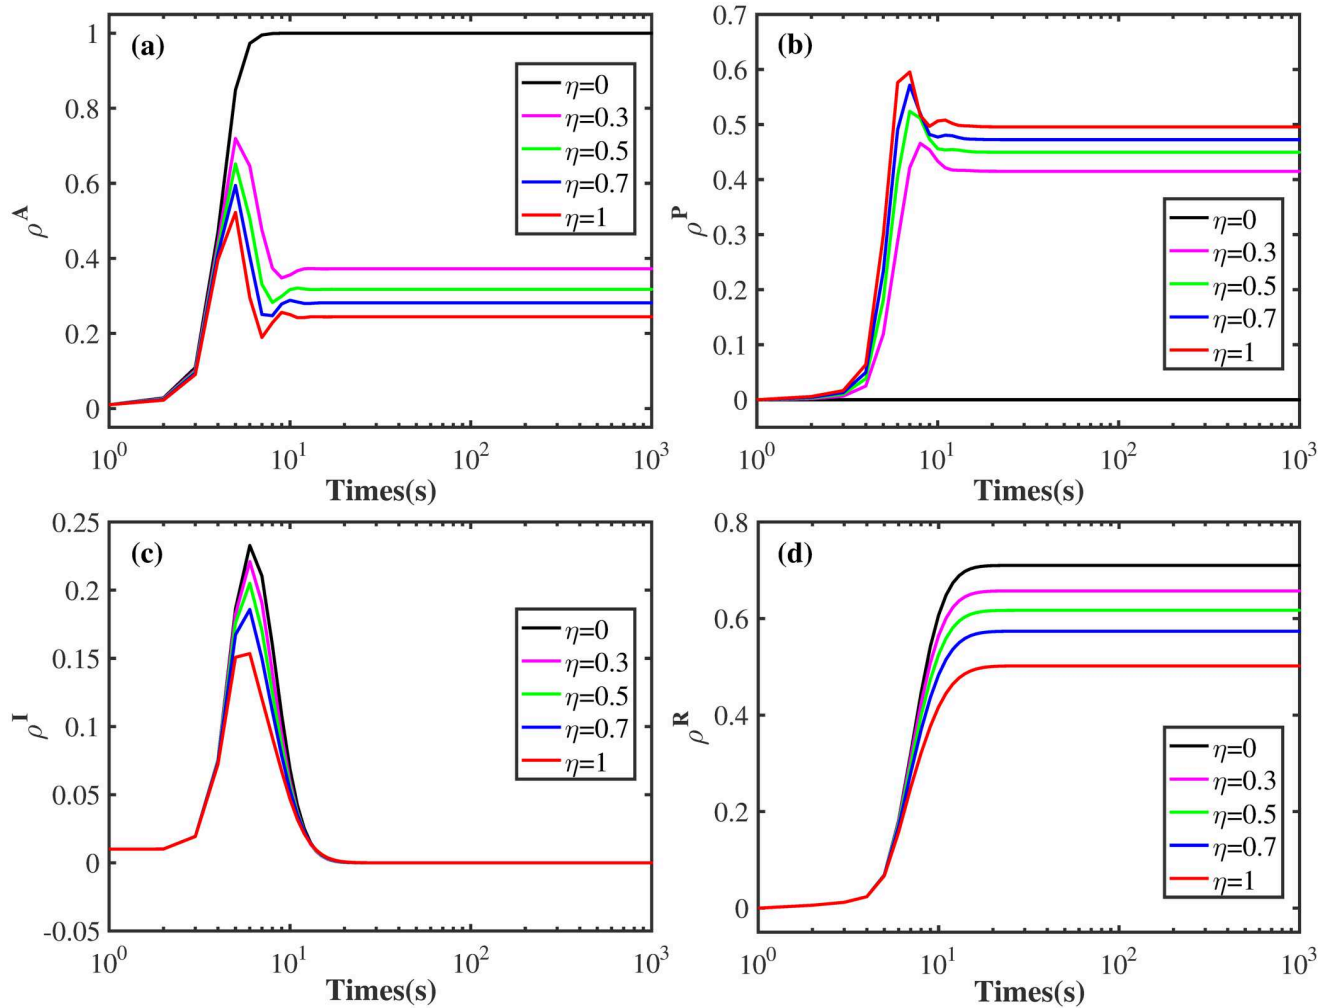

**Fig 4. Effect of behavioral observability factor  $\eta$  on epidemic size and disease spreading speed from a microscopic point of view.** (a) The fraction of A-state individuals  $\rho^A$ . (b) The proportion of protective action taken nodes  $\rho^P$ . (c) The percentage of infected individuals  $\rho^I$ . (d) The fraction of recovered nodes  $\rho^R$ . Here,  $\lambda = 0.3$ ,  $\delta = 0.4$ ,  $\beta = 0.2$ ,  $\mu = 0.6$ , and  $p = 0.5$ . Transmission speed, epidemic size are both inhibited for rising  $\eta$ , while  $\rho^A$ ,  $\rho^I$ ,  $\rho^R$  and the corresponding critical value are greatly decreased.

<https://doi.org/10.1371/journal.pone.0307553.g004>

measures. Conversely, the values of  $\rho^A$ ,  $\rho^I$  and  $\rho^R$  all display a salient drop with rising  $\eta$ , indicating that the protecting actions resulted from behavioral observability and social proof can suppress the epidemic size and transmission speed.

Fig 5 uncovers the changes of  $\rho^R$  with epidemic infection rate  $\beta$  when behavioral observability factor  $\eta$  takes different values, and compares the results of MMCA and MC. We find that compared to the value of  $\rho^R$  when  $\eta = 0$ , an obvious decrease can be seen for  $\eta = 1$ , which validates that increasing the observability of nearby neighbors' preventive actions can inhibit epidemic propagation. Besides, the findings demonstrate that the results of MMCA and MC have a good consistency.

Fig 6 examines the changes of  $\rho^P$  and  $\rho^R$  with information diffusion rate  $\lambda$  when information forgetting rate  $\delta$  takes distinct values. It can be detected that, for  $\lambda \leq 0.3$ , greater  $\rho^P$  corresponds to larger values of  $\lambda$ , which indicates that the faster the information spreads, the more individuals taking protecting measures. However, increment of  $\delta$  suppresses the influence of

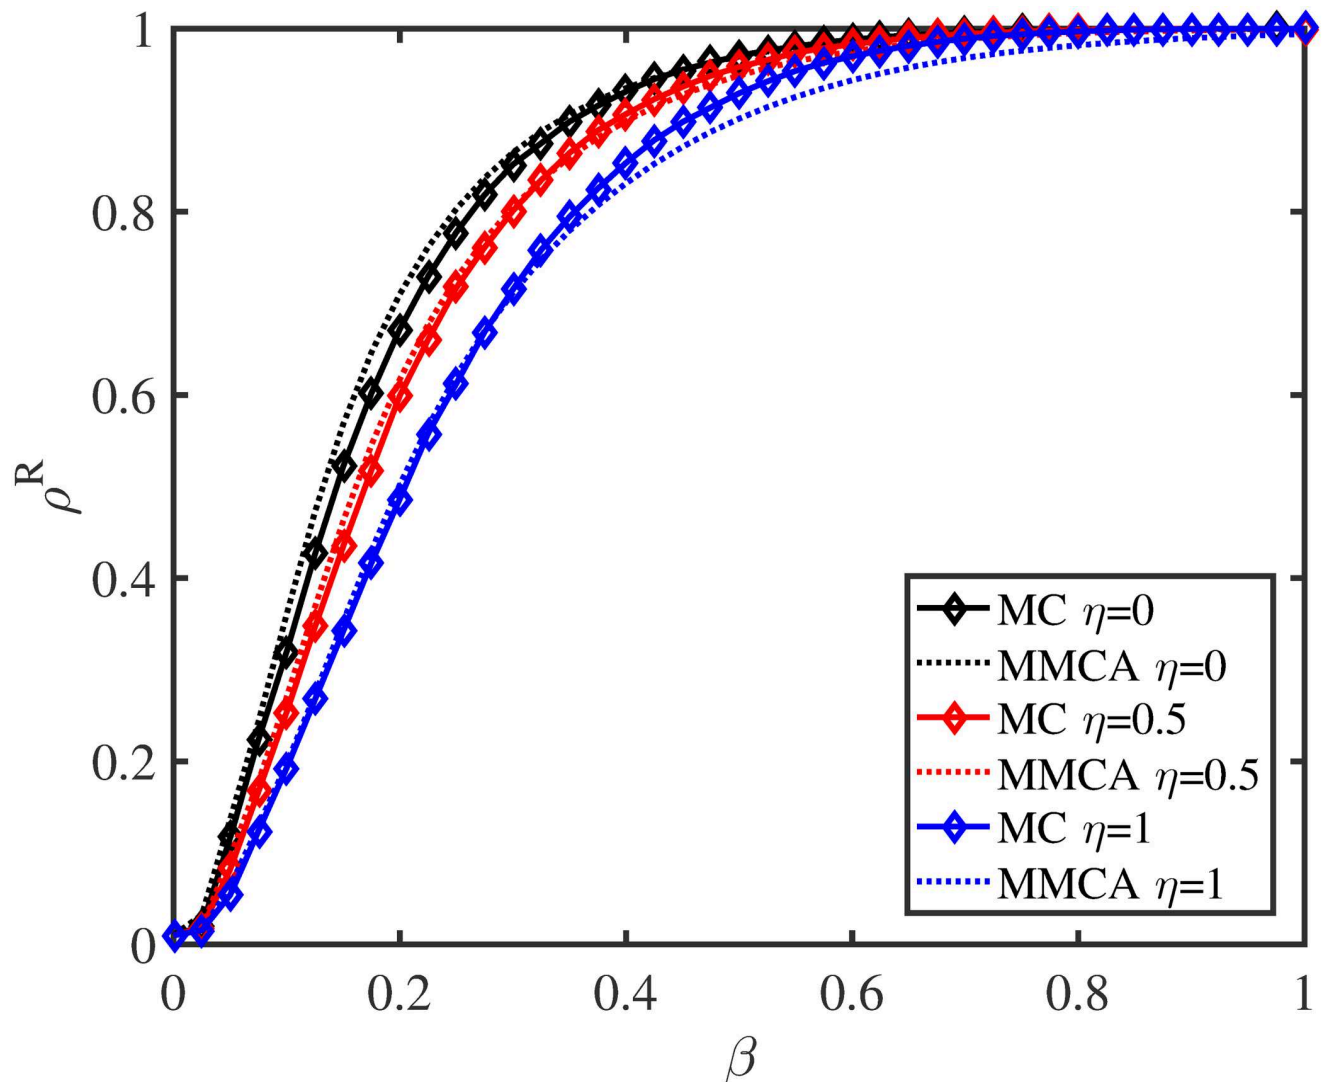

**Fig 5. Influence of  $\eta$  on disease size and epidemic transmission speed.** Here,  $\lambda = 0.3$ ,  $\delta = 0.4$ ,  $\mu = 0.6$ , and  $p = 0.5$ .

<https://doi.org/10.1371/journal.pone.0307553.g005>

information dissemination on the emergence of protective behaviors. Moreover, for fixed  $\delta$ , greater  $\lambda$  leads to an obvious decrease of  $\rho^R$ , which implies that in our model, the spreading of information greatly inhibits epidemic size. Whereas, for increasing  $\delta$ , the inhibition effect of information diffusion on epidemic transmission is reduced.

Fig 7 unveils the changes of  $\rho^P$  and  $\rho^R$  with behavioral observability factor  $\eta$  when information disremembering rate  $\delta$  takes different values. Notably, for fixed  $\delta$ , when protective behaviors are observable, the values of  $\rho^P$  exhibits a dramatic increase with rising  $\eta$ . In contrast, the values of  $\rho^R$  shows an obvious decrease, which further confirms the essential role of behavioral observability and social proof in suppressing epidemic spreading. Furthermore, the greater  $\delta$  is, the smaller  $\rho^P$  and higher  $\rho^R$  can be observed, which is due mainly to the fact that the faster epidemic-related information disappears, the fewer individuals will obtain the information in the whole population. Individuals tend to take protective measures only if they get the disease-related information and observe others around have taken corresponding protecting actions.

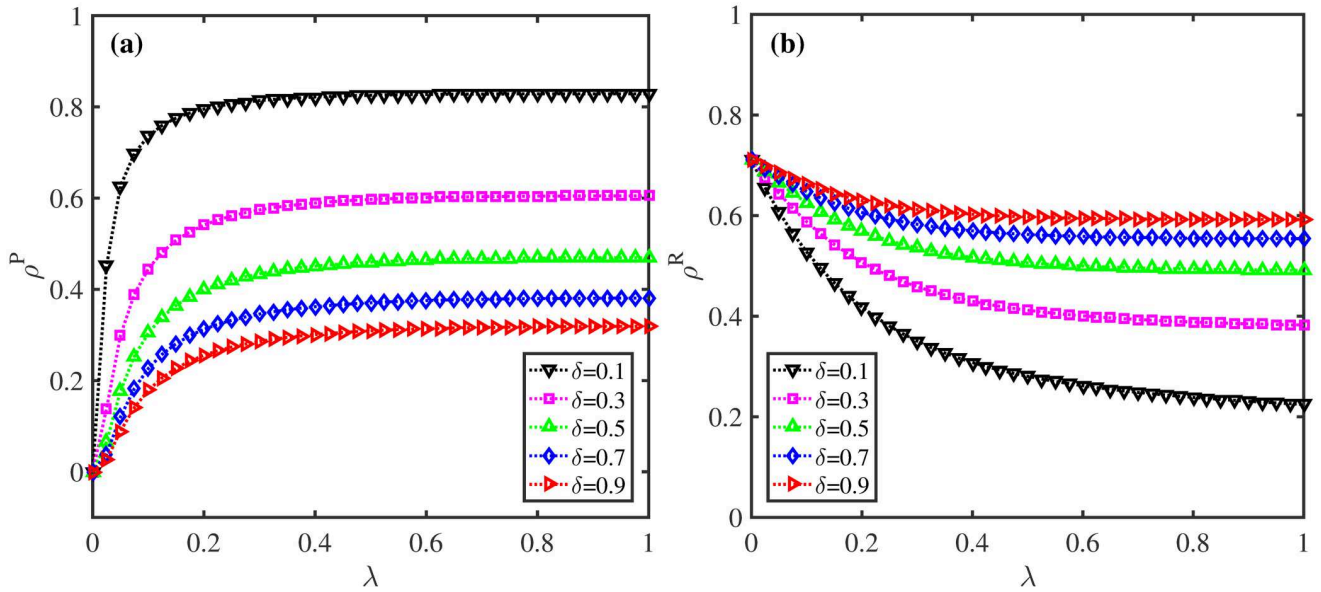

**Fig 6. Impact of information diffusion rate  $\lambda$  and information forgetting rate  $\delta$  on  $\rho^P$  and  $\rho^R$ .** (a) The fraction of preventive action taken nodes  $\rho^P$ ; (b) The density of recovered nodes  $\rho^R$ . Here,  $\eta = 1, \beta = 0.2, \mu = 0.6$ , and  $p = 0.5$ .

<https://doi.org/10.1371/journal.pone.0307553.g006>

These findings suggest that decreasing disremembering rate of information can lead to smaller epidemic size.

We discuss the influence of behavioral observability factor  $\eta$  on  $\rho^P$  and  $\rho^R$  in Fig 8. Clearly, when  $\eta$  is risen from 0.1 [panel (d)] to 1 [panel (f)], the values of  $\rho^R$  reflects an obvious drop,

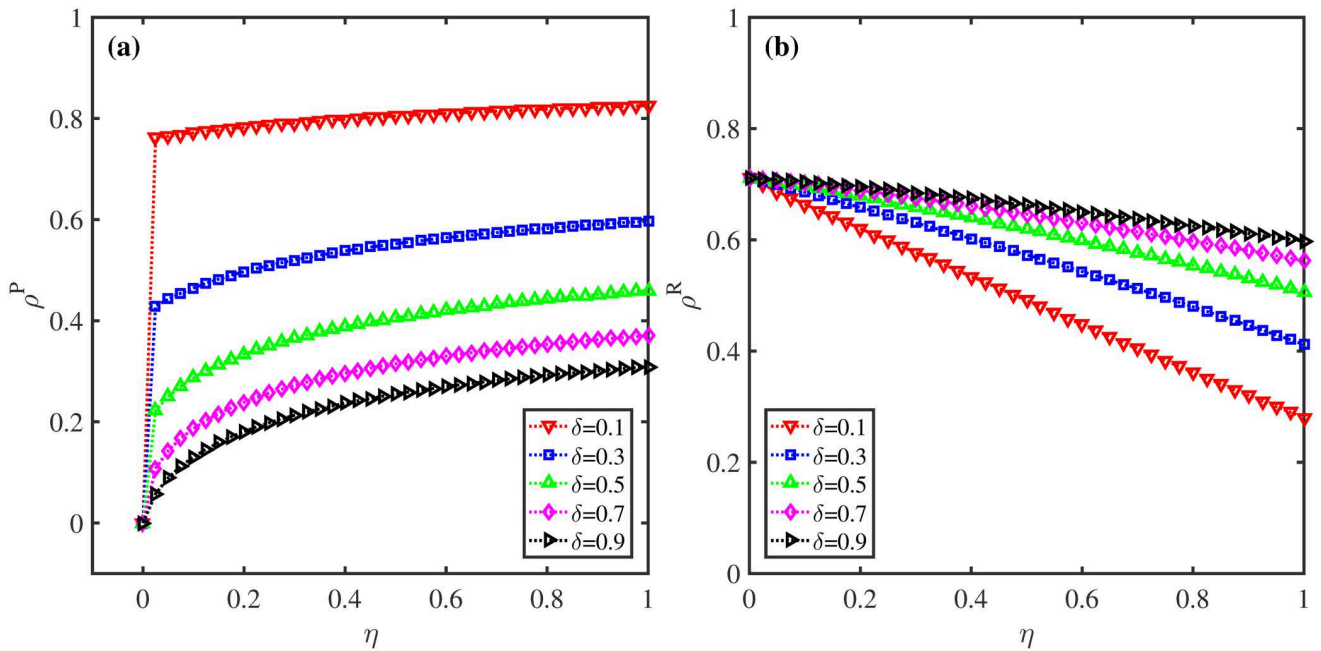

**Fig 7. Effect of behavioral observability factor  $\eta$  and information forgetting rate  $\delta$  on  $\rho^P$  and  $\rho^R$ .** (a) The proportion of protective action taken individuals  $\rho^P$ ; (b) The fraction of recovered nodes  $\rho^R$ . Here,  $\lambda = 0.5, \beta = 0.2, \mu = 0.6$ , and  $p = 0.5$ .

<https://doi.org/10.1371/journal.pone.0307553.g007>

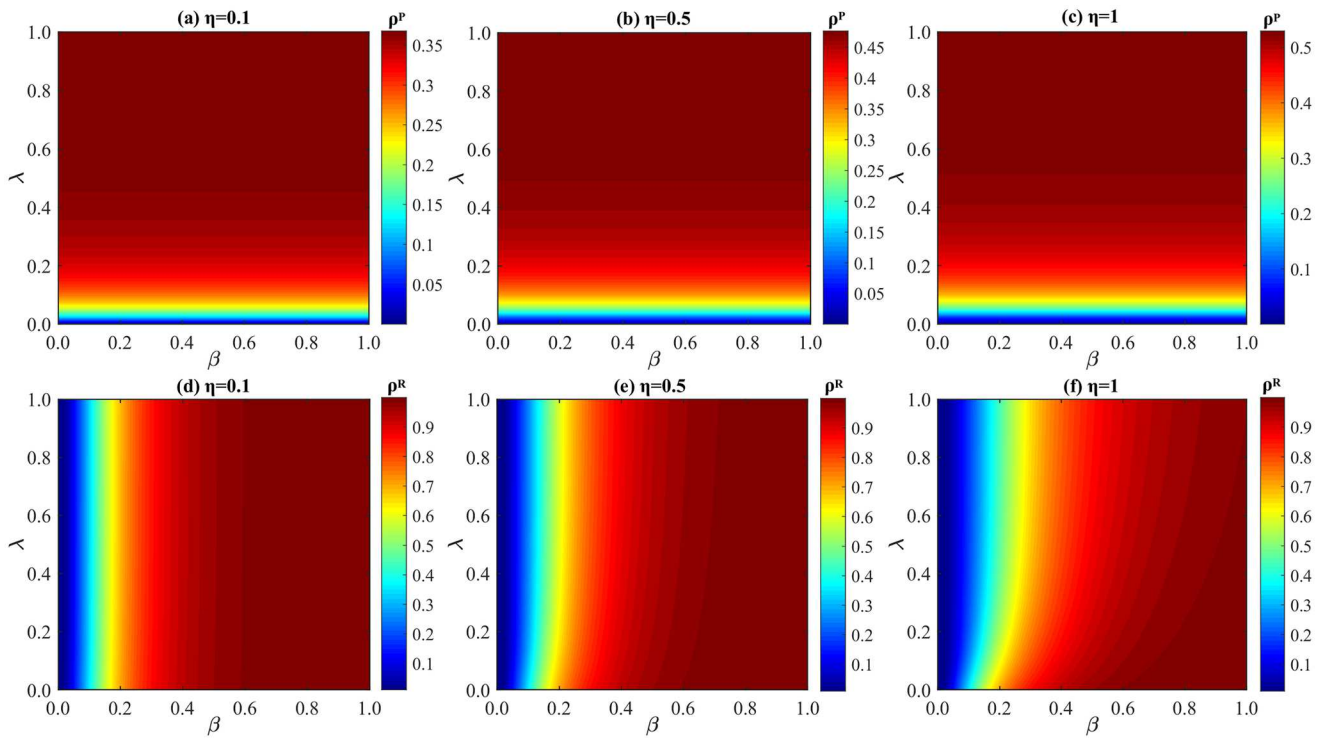

**Fig 8. Impact of  $\lambda$  and  $\beta$  on  $\rho^P$  and  $\rho^R$  under distinct values of  $\eta$ .** (a)  $\rho^P$  when  $\eta = 0.1$ ; (b)  $\rho^P$  when  $\eta = 0.5$ ; (c)  $\rho^P$  when  $\eta = 1$ ; (d)  $\rho^R$  when  $\eta = 0.1$ ; (e)  $\rho^R$  when  $\eta = 0.5$ ; (f)  $\rho^R$  when  $\eta = 1$ . The parameters:  $\delta = 0.4$ ,  $\mu = 0.6$ , and  $p = 0.5$ .

<https://doi.org/10.1371/journal.pone.0307553.g008>

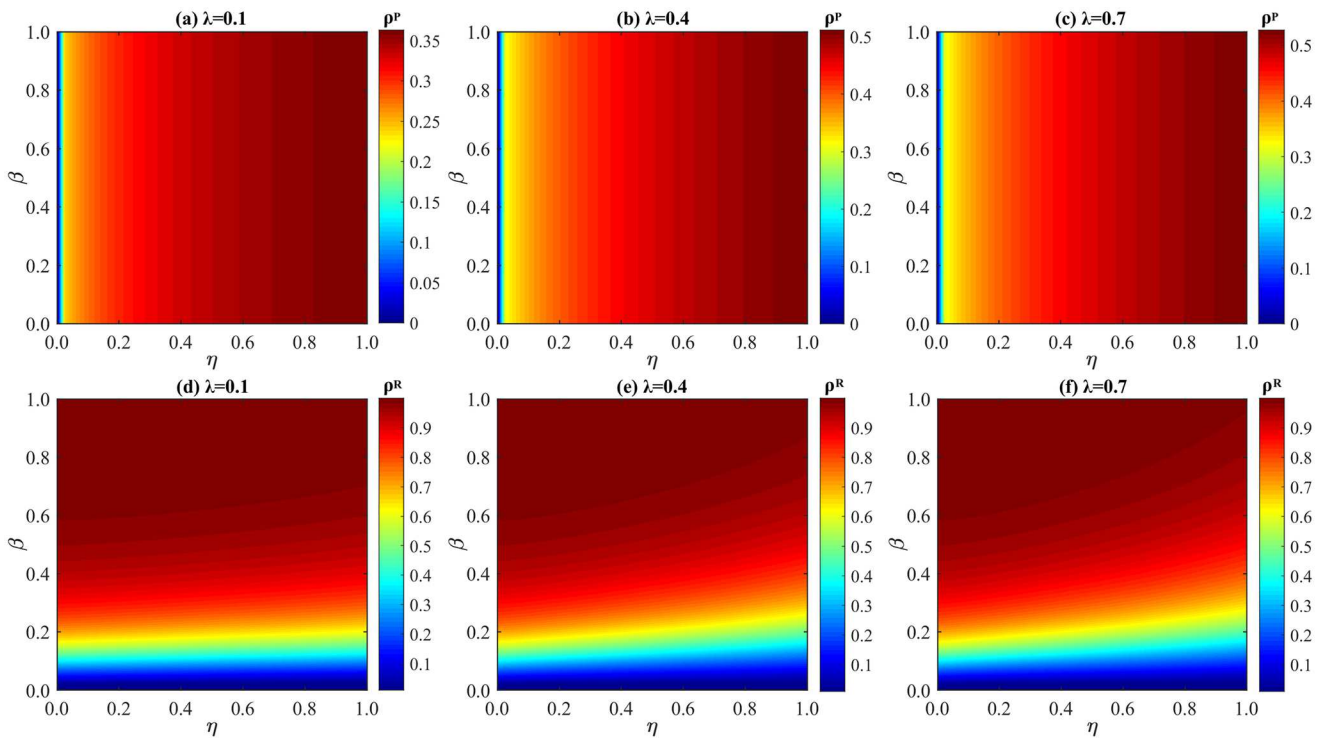

**Fig 9. Influence of  $\eta$  and  $\beta$  on  $\rho^P$  and  $\rho^R$  under different values of  $\lambda$ .** (a)  $\rho^P$  when  $\lambda = 0.1$ ; (b)  $\rho^P$  when  $\lambda = 0.4$ ; (c)  $\rho^P$  when  $\lambda = 0.7$ ; (d)  $\rho^R$  when  $\lambda = 0.1$ ; (e)  $\rho^R$  when  $\lambda = 0.4$ ; (f)  $\rho^R$  when  $\lambda = 0.7$ . Here,  $\delta = 0.4$ ,  $\mu = 0.6$ , and  $p = 0.5$ .

<https://doi.org/10.1371/journal.pone.0307553.g009>

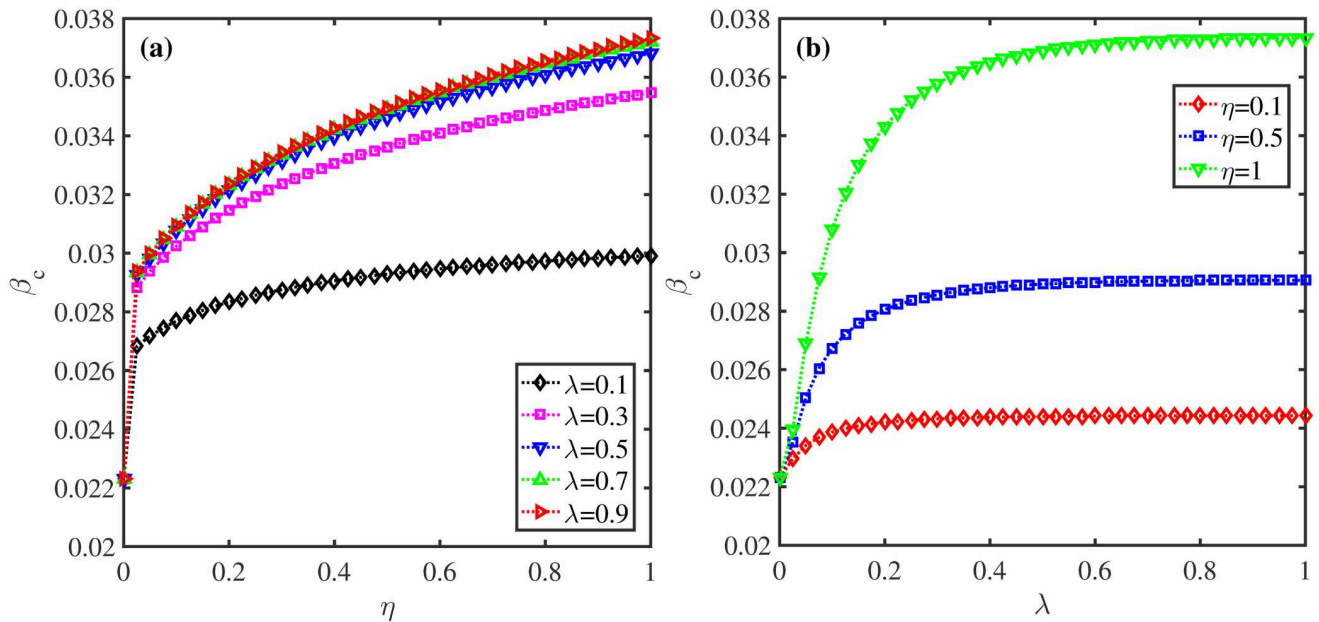

**Fig 10. Effect of  $\eta$  and  $\lambda$  on epidemic outbreak threshold.** (a) The epidemic threshold  $\beta_c$  as a function of  $\eta$  under different values of  $\lambda$ . (b) The epidemic threshold  $\beta_c$  as a function of  $\lambda$  for distinct values of  $\eta$ . The parameters:  $\delta = 0.1$ ,  $\sigma = 0.2$ , and  $\mu = 0.6$ .

<https://doi.org/10.1371/journal.pone.0307553.g010>

which demonstrates that epidemic spreading is significantly inhibited when  $\eta$  is increased. It is mainly because of more individuals will imitate the protective measures when the observability of preventive actions is risen, which also results in the increase of P-state individuals (as shown in panel(a) to panel(c)). Besides, it is worth noting that only when the observability of neighbors' protective actions reaches a certain level, epidemic spreading can be inhibited by accelerating information diffusion. Whereas, if the behavioral observability factor  $\eta$  is small, such as  $\eta = 0.1$ , accelerating information dissemination does not have significant impacts on suppressing disease transmission.

We scrutinize the impact of information diffusion rate  $\lambda$  on  $\rho^P$  and  $\rho^R$  in Fig 9. Notably, with  $\lambda$  fixed, the greater  $\eta$  is, the higher the probability of individuals imitating the observable protective actions under the influence of social proof. Most importantly, the density of R-state individuals is greatly decreased when  $\lambda$  is risen from 0.1 [panel (d)] to 0.7 [panel (f)], which verifies that when information spreads faster, driven by behavioral observability, more individuals are inclined to imitate immediate neighbors and take protecting actions, which results in smaller disease spreading size. However, it also can be found that when  $\lambda \geq 0.4$ , with the increase of  $\eta$ ,  $\rho^P$  does not show an obvious change, which is mainly because of the influence of social proof. Since the percentage of P-state individuals is jointly decided by behavioral observability and social proof (as shown in Eq 1). To sum up, when  $\lambda \leq 0.4$ , under the joint effects of behavioral observability and social proof, the faster the information spreads, the more obvious the suppression effects of our model on epidemic size.

Finally, we investigate the changes of  $\beta_c$  with  $\eta$  and  $\lambda$  in Fig 10. We find that  $\beta_c$  significantly increases with rising  $\eta$  for fixed  $\lambda$ , indicating that increasing observability of neighbors' protective actions promotes epidemic threshold. Nevertheless, when  $\lambda \geq 0.5$ , further increment of information dissemination does not result in higher epidemic threshold. Since in such a situation, most individuals in the population have obtained the disease-related information. Meanwhile, in Fig 10(b), it can be observed that  $\beta_c$  exhibits an increase with rising  $\lambda$  for fixed  $\eta$ , and

the larger  $\eta$  is, the more obvious the change of  $\beta_c$  with  $\lambda$ , which further validates that behavioral observability can raise the epidemic threshold.

## Conclusion

During the awareness-epidemic coupled spreading process, both the protective actions taken by direct neighbors and the observability of these actions have crucial influence on our decisions. To uncover the impacts of behavioral observability and social proof on epidemic propagation, we propose a UAPU-SIR model by incorporating the effects of these two factors into the decision-making process of taking protection measures. More explicitly, a new state called taken protective actions is introduced into the classical UAU model to describe the action-taken status of individuals after getting disease-related information. The MMCA is applied to theoretically analyze the presented model and derive the epidemic threshold. To the best of our knowledge, the impacts of behavioral observability and social proof on epidemic spreading has not been previously reported. By theoretical analysis and simulation, we show that the observability of preventive actions and social proof suppress dissemination speed and outbreak size of infective disease, and cause higher epidemic threshold. Furthermore, under the proposed model, only if the observability of protective behavior reaches a certain level, can accelerating information diffusion inhibit epidemic transmission and raise epidemic threshold. We also found that, decreasing the disremembering rate of information can reduce epidemic size.

Our results may offer some insight into predicting and controlling the actual spreading process of epidemic. Nevertheless, in the present model, the behavioral spreading resulting from information diffusion has not been taken into consideration, which also plays an important role in epidemic spreading. In the future work, a more sophisticated UAPU-SEIR model taking into account behavioral propagation will be the focus of our investigation.

## Author Contributions

**Conceptualization:** Huayan Pei.

**Formal analysis:** Huanmin Wang.

**Funding acquisition:** Guanghui Yan.

**Investigation:** Huanmin Wang.

**Methodology:** Huayan Pei.

**Project administration:** Guanghui Yan.

**Writing – original draft:** Huayan Pei.

**Writing – review & editing:** Huanmin Wang.

## References

1. Mack TM. Smallpox in Europe, 1950-1971. *J. Infect. Dis.* 1972; 125(2):161–169. <https://doi.org/10.1093/infdis/125.2.161> PMID: 5007552
2. Moss WJ, & Griffin DE. Global measles elimination. *Nat. Rev. Microbiol.* 2006; 4(12):900–908. <https://doi.org/10.1038/nrmicro1550> PMID: 17088933
3. Emond RT, Evans B, & Bowen ET, et al. A case of Ebola virus infection. *Br Med J.* 1977; 2(6086):541–544. <https://doi.org/10.1136/bmj.2.6086.541> PMID: 890413
4. Gostin LO, & Friedman EA. A retrospective and prospective analysis of the west African Ebola virus disease epidemic: robust national health systems at the foundation and an empowered WHO at the apex. *The Lancet.* 2015; 385(9980):1902–1909. [https://doi.org/10.1016/S0140-6736\(15\)60644-4](https://doi.org/10.1016/S0140-6736(15)60644-4)

5. Chen X, Liao B, & Cheng L, et al. The microbial coinfection in COVID-19. *Appl. Microbiol. Biotechnol.* 2020; 104:7777–7785. <https://doi.org/10.1007/s00253-020-10814-6> PMID: 32780290
6. Baloch S, Baloch MA, & Zheng T, et al. The coronavirus disease 2019 (COVID-19) pandemic. *Tohoku J. Exp. Med.* 2020; 250(4):271–278. <https://doi.org/10.1620/tjem.250.271> PMID: 32321874
7. Dhama K, Khan S, & Tiwari R, et al. Coronavirus disease 2019-COVID-19. *Clin. Microbiol. Rev.* 2020; 33(4):10–1128. <https://doi.org/10.1128/CMR.00028-20>
8. Funk S, Gilad E, & Jansen V-AA. Endemic disease, awareness, and local behavioural response. *J. Theor. Biol.* 2010; 264(2):501–509. <https://doi.org/10.1016/j.jtbi.2010.02.032> PMID: 20184901
9. Funk S, Gilad E, & Watkins C, et al. The spread of awareness and its impact on epidemic outbreaks. *Proc. Natl. Acad. Sci.* 2009; 106(16):6872–6877. <https://doi.org/10.1073/pnas.0810762106> PMID: 19332788
10. Tangcharoensathien V, Calleja N, & Nguyen T, et al. Framework for managing the COVID-19 infodemic: methods and results of an online, crowdsourced WHO technical consultation. *J. Medical Internet Res.* 2020; 22(6):e19659. <https://doi.org/10.2196/19659> PMID: 32558655
11. Ferguson N. Capturing human behaviour. *Nature.* 2007; 446(7137):733–733. <https://doi.org/10.1038/446733a> PMID: 17429381
12. Wang Z, Andrews MA, & Wu ZX, et al. Coupled disease-behavior dynamics on complex networks: A review. *Phys. Life Rev.* 2015; 15:1–29. <https://doi.org/10.1016/j.plrev.2015.07.006> PMID: 26211717
13. Perra N, Balcan D, & Gonçalves B, et al. Towards a characterization of behavior-disease models. *PloS One.* 2011; 6(8):e23084. <https://doi.org/10.1371/journal.pone.0023084> PMID: 21826228
14. Li Y, Zeng Z, & Feng M, et al. Protection degree and migration in the stochastic SIRS model: A queueing system perspective. *TCAS-I.* 2021; 69(2):771–783.
15. Granell C, Gómez S, & Arenas A. Dynamical interplay between awareness and epidemic spreading in multiplex networks. *Phys. Rev. Lett.* 2013; 111(12):128701. <https://doi.org/10.1103/PhysRevLett.111.128701> PMID: 24093306
16. Granell C, Gómez S, & Arenas A. Competing spreading processes on multiplex networks: awareness and epidemics. *Phys. Rev. E.* 2014; 90(1):012808. <https://doi.org/10.1103/PhysRevE.90.012808> PMID: 25122343
17. Wang W, Tang M, & Yang H, et al. Asymmetrically interacting spreading dynamics on complex layered networks. *Sci. Rep.* 2014; 4(1):5097. <https://doi.org/10.1038/srep05097> PMID: 24872257
18. Guo QT, Jiang X, & Lei YJ, et al. Two-stage effects of awareness cascade on epidemic spreading in multiplex networks. *Phys. Rev. E.* 2015; 91(1):012822. <https://doi.org/10.1103/PhysRevE.91.012822> PMID: 25679671
19. Wang W, Liu QH, & Cai SM, et al. Suppressing disease spreading by using information diffusion on multiplex networks. *Phys. Rep.* 2016; 6(1):29259. <https://doi.org/10.1038/srep29259> PMID: 27380881
20. Zheng CY, Xia CY, & Guo QT, et al. Interplay between SIR-based disease spreading and awareness diffusion on multiplex networks. *J Parallel Distrib. Comput.* 2018; 115:20–28. <https://doi.org/10.1016/j.jpdc.2018.01.001>
21. Zhan XX, Liu C, & Zhou G, et al. Coupling dynamics of epidemic spreading and information diffusion on complex networks. *Appl. Math. Comput.* 2018; 332:437–448. <https://doi.org/10.1016/j.amc.2018.03.050> PMID: 32287501
22. Xia CY, Wang ZS, & Zheng CY, et al. A new coupled disease-awareness spreading model with mass media on multiplex networks. *Inf. Sci.* 2019; 471:185–200. <https://doi.org/10.1016/j.ins.2018.08.050>
23. Wang ZS, Guo QT, & Sun SW, et al. The impact of awareness diffusion on SIR-like epidemics in multiplex networks. *Appl. Math. Comput.* 2019; 349:134–147.
24. Kabir KMA, Kuga K, & Tanimoto J. Analysis of SIR epidemic model with information spreading of awareness. *Chaos, Solitons & Fractals.* 2019; 119:118–125. <https://doi.org/10.1016/j.chaos.2018.12.017>
25. Kabir KMA, & Tanimoto J. Analysis of epidemic outbreaks in two-layer networks with different structures for information spreading and disease diffusion. *Commun. Nonlinear Sci. Numer. Simul.* 2019; 72:565–574. <https://doi.org/10.1016/j.cnsns.2019.01.020>
26. Wang ZS, & Xia CY. Co-evolution spreading of multiple information and epidemics on two-layered networks under the influence of mass media. *Nonlinear Dyn.* 2020; 102:3039–3052. <https://doi.org/10.1007/s11071-020-06021-7> PMID: 33162672
27. Wang ZS, Xia CY, & Chen ZQ, et al. Epidemic propagation with positive and negative preventive information in multiplex networks. *IEEE Trans. Cybern.* 2020; 51(3):1454–1462. <https://doi.org/10.1109/TCYB.2019.2960605>
28. Feng M, Li X, & Li Y, et al. The impact of nodes of information dissemination on epidemic spreading in dynamic multiplex networks. *Chaos.* 2023; 33(4). <https://doi.org/10.1063/5.0142386> PMID: 37097954

29. Easley D, & Kleinberg J. *Networks, crowds, and markets: Reasoning about a highly connected world*. Cambridge university press Cambridge. 2010; 1.
30. Young HP. Innovation diffusion in heterogeneous populations: Contagion, social influence, and social learning. *Am. Econ. Rev.* 2009; 99(5):1899–1924. <https://doi.org/10.1257/aer.99.5.1899>
31. Karrer B, & Newman MEJ. Message passing approach for general epidemic models. *Phys. Rev. E.* 2010; 82(1):016101. <https://doi.org/10.1103/PhysRevE.82.016101> PMID: 20866683
32. Onnela JP, & Reed-Tsochas F. Spontaneous emergence of social influence in online systems. *Proc. Natl. Acad. Sci. U.S.A.* 2010; 107(43):18375–18380. <https://doi.org/10.1073/pnas.0914572107> PMID: 20937864
33. Funk S, Salathé M, & Jansen VAA. Modelling the influence of human behaviour on the spread of infectious diseases: a review. *J. R. Soc. Interface.* 2010; 7(50):1247–1256. <https://doi.org/10.1098/rsif.2010.0142> PMID: 20504800
34. Amblee N, & Bui T. Harnessing the influence of social proof in online shopping: The effect of electronic word of mouth on sales of digital microproducts. *Int. J. Electron Comm.* 2011; 16(2):91–114. <https://doi.org/10.2753/JEC1086-4415160205>
35. Naeem M. Do social media platforms develop consumer panic buying during the fear of Covid-19 pandemic. *J. Retail Consum Serv.* 2021; 58:102226. <https://doi.org/10.1016/j.jretconser.2020.102226>
36. Haley KJ, & Fessler DMT. Nobody's watching?: Subtle cues affect generosity in an anonymous economic game. *Evol. Hum. Behav.* 2005; 26(3):245–256. <https://doi.org/10.1016/j.evolhumbehav.2005.01.002>
37. Burnham TC, & Hare B. Engineering human cooperation: Does involuntary neural activation increase public goods contributions?. *Hum. Nat.* 2007; 18:88–108. <https://doi.org/10.1007/s12110-007-9012-2> PMID: 26181843
38. Boguná M, Castellano C, & Pastor-Satorras R. Langevin approach for the dynamics of the contact process on annealed scale-free networks. *Phys. Rev. E.* 2009; 79(3):036110. <https://doi.org/10.1103/PhysRevE.79.036110> PMID: 19392021
